# Supplementary material for: Characterization of the First Case of Classical Scrapie in a Sheep in Tunisia
Source: Hindawi journal article supplement (doi:10.1155/2023/2253316), 2023-10-25

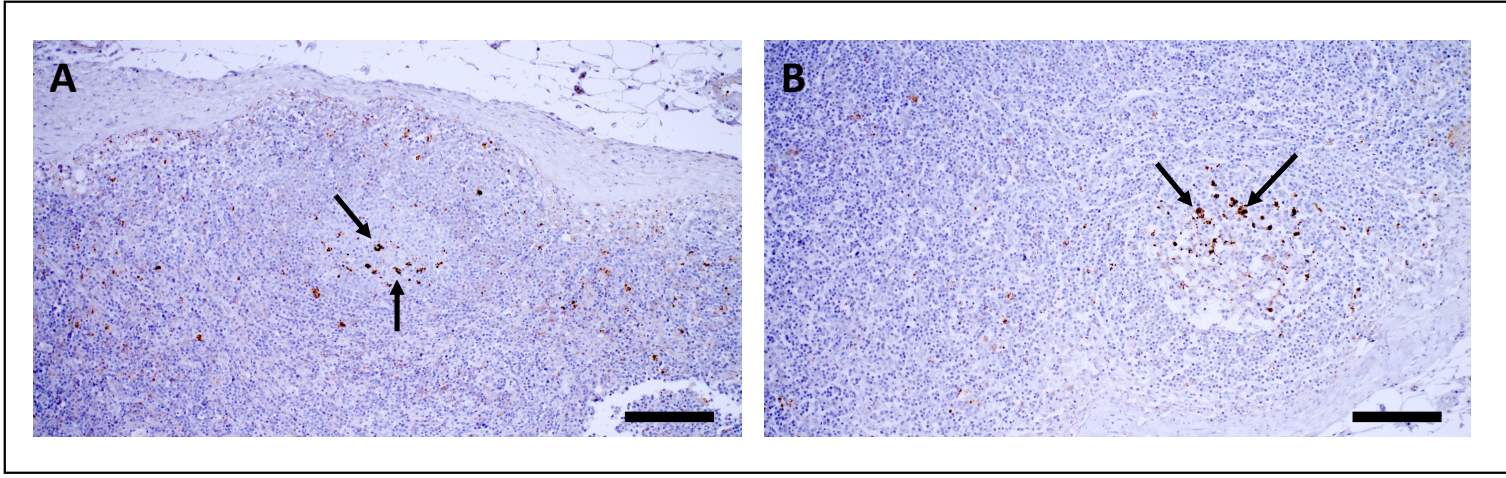

Supplement: f1 [file 2253316.f1.pdf]
